# Supplementary material for: Mendelian randomization analysis to explore the relationship between cathepsins and malignant ovarian tumors
Source: PubMed Central journal article supplement — Medicine (Baltimore). 2024 Nov 15;103(46):e40219. doi: 10.1097/MD.0000000000040219 (PMC11575957; doi:10.1097/md.0000000000040219), 2024-11-15
Supplement: medi-103-e40219-s001.pdf [file medi-103-e40219-s001.pdf]

Supplementary Table 1: Characteristics of single nucleotide polymorphisms (SNPs) extracted from the GWAS statistical summary data.

| Supplementary Table 1   Characteristics of SNPs extracted from exposure (nine types of cathepsins) GWAS statistical summary data. |             |             |         |         |           |             |                           |           |
|-----------------------------------------------------------------------------------------------------------------------------------|-------------|-------------|---------|---------|-----------|-------------|---------------------------|-----------|
|                                                                                                                                   | SNP         | EA          | OA      | EAF     | se        | F-Statistic | Association with exposure |           |
|                                                                                                                                   |             |             |         |         |           |             | Beta                      | P-value   |
| Cathepsin B                                                                                                                       | rs75773690  | A           | G       | 0.02192 | 0.0857    | 21.19007    | -0.3945                   | 4.17E-06  |
|                                                                                                                                   | rs113646963 | T           | C       | 0.09708 | 0.0427    | 21.85070    | 0.1996                    | 2.95E-06  |
|                                                                                                                                   | rs76089522  | A           | G       | 0.10475 | 0.0421    | 21.91841    | -0.1971                   | 2.88E-06  |
|                                                                                                                                   | rs13152767  | A           | G       | 0.02617 | 0.0867    | 23.00016    | 0.4158                    | 1.62E-06  |
|                                                                                                                                   | rs36021960  | A           | G       | 0.12637 | 0.0374    | 21.81939    | 0.1747                    | 3.02E-06  |
|                                                                                                                                   | rs11563944  | G           | A       | 0.26799 | 0.0278    | 21.56567    | 0.1291                    | 3.55E-06  |
|                                                                                                                                   | rs148930853 | C           | T       | 0.01211 | 0.1781    | 21.81467    | 0.2516                    | 3.02E-06  |
|                                                                                                                                   | rs1692819   | A           | G       | 0.29182 | 0.0274    | 240.13687   | 0.4246                    | 5.55E-54  |
|                                                                                                                                   | rs72863882  | A           | G       | 0.08353 | 0.0475    | 29.25102    | -0.2569                   | 6.46E-08  |
|                                                                                                                                   | rs150811995 | C           | A       | 0.01878 | 0.1004    | 21.01912    | 0.4603                    | 4.57E-06  |
|                                                                                                                                   | rs117345475 | G           | A       | 0.02062 | 0.0933    | 21.55826    | -0.4332                   | 3.47E-06  |
|                                                                                                                                   | rs150370599 | T           | C       | 0.08341 | 0.0457    | 22.81787    | 0.2183                    | 1.78E-06  |
|                                                                                                                                   | rs143557119 | A           | G       | 0.02199 | 0.0946    | 20.92144    | 0.4327                    | 4.79E-06  |
|                                                                                                                                   | rs117486267 | C           | T       | 0.02886 | 0.0834    | 23.03770    | -0.4003                   | 1.58E-06  |
|                                                                                                                                   | rs147881440 | A           | G       | 0.06428 | 0.051     | 20.89028    | -0.2331                   | 4.79E-06  |
|                                                                                                                                   | rs9905973   | A           | G       | 0.271   | 0.0276    | 25.91400    | -0.1405                   | 3.55E-07  |
|                                                                                                                                   | rs200652433 | T           | C       | 0.04112 | 0.0684    | 24.54884    | 0.3389                    | 7.24E-07  |
|                                                                                                                                   | rs7249773   | A           | G       | 0.15121 | 0.0351    | 24.82935    | 0.1749                    | 6.03E-07  |
|                                                                                                                                   | rs1065853   | T           | G       | 0.07778 | 0.0463    | 23.95288    | 0.2266                    | 1.00E-06  |
|                                                                                                                                   | Cathepsin E | rs149553686 | C       | T       | 0.06772   | 0.0525      | 21.33560                  | 0.2425    |
| rs13098937                                                                                                                        |             | T           | C       | 0.49349 | 0.025     | 21.23666    | -0.1152                   | 4.17E-06  |
| rs57689619                                                                                                                        |             | G           | A       | 0.08618 | 0.0444    | 21.90409    | -0.2078                   | 2.82E-06  |
| rs189009983                                                                                                                       |             | T           | C       | 0.00831 | 0.1541    | 20.95988    | 0.7055                    | 4.68E-06  |
| rs10900907                                                                                                                        |             | A           | G       | 0.41707 | 0.0255    | 21.70464    | 0.1188                    | 3.24E-06  |
| rs112918835                                                                                                                       |             | T           | C       | 0.00706 | 0.1526    | 21.41639    | 0.7062                    | 3.72E-06  |
| rs57135345                                                                                                                        |             | T           | C       | 0.05697 | 0.0542    | 21.87547    | 0.2535                    | 2.95E-06  |
| rs1935839                                                                                                                         |             | C           | G       | 0.03257 | 0.0325    | 22.54085    | 0.1562                    | 2.00E-06  |
| rs74677283                                                                                                                        |             | C           | G       | 0.02151 | 0.0882    | 24.64976    | 0.4379                    | 6.76E-07  |
| rs8066936                                                                                                                         |             | A           | G       | 0.1792  | 0.0325    | 21.07516    | -0.1492                   | 4.27E-06  |
| rs10401027                                                                                                                        |             | A           | G       | 0.45246 | 0.0259    | 22.37034    | -0.1225                   | 2.24E-06  |
| Cathepsin F                                                                                                                       |             | rs647400    | A       | G       | 0.19253   | 0.0314      | 22.57763                  | 0.1492    |
|                                                                                                                                   | rs7564167   | G           | A       | 0.93594 | 0.0526    | 25.36252    | -0.2649                   | 4.90E-07  |
|                                                                                                                                   | rs115901379 | G           | T       | 0.02042 | 0.0927    | 21.57688    | 0.4306                    | 3.39E-06  |
|                                                                                                                                   | rs1260326   | C           | T       | 0.59849 | 0.0252    | 42.54860    | -0.1642                   | 6.92E-11  |
|                                                                                                                                   | rs58531759  | G           | T       | 0.03949 | 0.0747    | 24.82627    | 0.3722                    | 6.31E-07  |
|                                                                                                                                   | rs186369051 | T           | C       | 0.01504 | 0.1026    | 22.05154    | -0.4818                   | 2.63E-06  |
|                                                                                                                                   | rs183683891 | T           | C       | 0.01536 | 0.1123    | 21.78886    | -0.5242                   | 3.02E-06  |
|                                                                                                                                   | rs112526544 | G           | A       | 0.02831 | 0.0766    | 24.62284    | 0.3801                    | 6.92E-07  |
|                                                                                                                                   | rs61866943  | T           | T       | 0.01874 | 0.1012    | 24.10888    | 0.4969                    | 9.12E-07  |
|                                                                                                                                   | rs1791679   | A           | C       | 0.28947 | 0.0269    | 76.25380    | 0.2349                    | 2.51E-18  |
|                                                                                                                                   | rs10745925  | A           | G       | 0.29402 | 0.0268    | 115.00162   | -0.2674                   | 9.12E-27  |
|                                                                                                                                   | rs143015877 | T           | C       | 0.25734 | 0.0287    | 21.31415    | -0.1325                   | 3.98E-06  |
| rs9796775                                                                                                                         | G           | A           | 0.50502 | 0.0249  | 22.15422  | -0.1172     | 2.45E-06                  |           |
| Cathepsin G                                                                                                                       | rs10170044  | G           | A       | 0.39112 | 0.0251    | 20.99173    | 0.115                     | 4.79E-06  |
|                                                                                                                                   | rs114418234 | C           | A       | 0.03719 | 0.065     | 22.40930    | 0.3077                    | 2.24E-06  |
|                                                                                                                                   | rs192289769 | G           | C       | 0.01364 | 0.1093    | 25.02745    | -0.5468                   | 5.62E-07  |
|                                                                                                                                   | rs147099093 | A           | G       | 0.02053 | 0.0885    | 23.29017    | 0.4271                    | 1.38E-06  |
|                                                                                                                                   | rs116142041 | A           | G       | 0.03645 | 0.0665    | 25.46934    | -0.3556                   | 4.57E-07  |
|                                                                                                                                   | rs548719719 | G           | A       | 0.03709 | 0.0708    | 21.87015    | 0.3311                    | 2.88E-06  |
|                                                                                                                                   | rs4702448   | A           | C       | 0.66583 | 0.0265    | 23.14881    | 0.1275                    | 1.45E-06  |
|                                                                                                                                   | rs497459    | C           | T       | 0.86534 | 0.0368    | 22.66588    | -0.1752                   | 1.95E-06  |
|                                                                                                                                   | rs62493038  | T           | C       | 0.03503 | 0.0725    | 21.87659    | -0.3391                   | 2.88E-06  |
|                                                                                                                                   | rs77893942  | A           | T       | 0.03128 | 0.0764    | 24.22083    | -0.376                    | 8.71E-07  |
|                                                                                                                                   | rs7273561   | C           | T       | 0.05703 | 0.0528    | 22.94192    | -0.2529                   | 1.70E-06  |
|                                                                                                                                   | rs35241999  | C           | A       | 0.02374 | 0.0869    | 21.81718    | 0.4059                    | 2.95E-06  |
| Cathepsin H                                                                                                                       | rs117133380 | A           | C       | 0.01556 | 0.1065    | 22.05912    | 0.5002                    | 2.63E-06  |
|                                                                                                                                   | rs56284011  | C           | G       | 0.03943 | 0.0656    | 22.85306    | -0.3136                   | 1.74E-06  |
|                                                                                                                                   | rs571991098 | T           | C       | 0.02347 | 0.0884    | 21.66881    | 0.4115                    | 3.24E-06  |
|                                                                                                                                   | rs35628511  | T           | C       | 0.3116  | 0.0272    | 21.22093    | -0.1253                   | 4.17E-06  |
|                                                                                                                                   | rs147991203 | T           | C       | 0.02671 | 0.0773    | 23.63494    | 0.3758                    | 1.17E-06  |
|                                                                                                                                   | rs508007    | T           | C       | 0.01025 | 0.1032    | 22.29510    | -0.1511                   | 2.40E-06  |
|                                                                                                                                   | rs62474230  | C           | G       | 0.06195 | 0.0506    | 22.06771    | -0.2377                   | 2.69E-06  |
|                                                                                                                                   | rs77977134  | C           | T       | 0.0493  | 0.0583    | 21.78311    | -0.2721                   | 3.02E-06  |
|                                                                                                                                   | rs62013235  | A           | G       | 0.091   | 0.0432    | 86.59336    | 0.402                     | 1.35E-20  |
|                                                                                                                                   | rs34593439  | A           | G       | 0.11066 | 0.0346    | 1098.94166  | -1.147                    | 1.00E-200 |
|                                                                                                                                   | rs12911554  | T           | C       | 0.55027 | 0.0251    | 22.78065    | -0.1198                   | 1.82E-06  |
|                                                                                                                                   | rs60018174  | T           | C       | 0.1159  | 0.0395    | 24.52130    | 0.1956                    | 7.24E-07  |
| rs146037740                                                                                                                       | A           | G           | 0.02925 | 0.0325  | 25.98914  | 0.4736      | 3.47E-06                  |           |
| rs74342103                                                                                                                        | T           | A           | 0.02583 | 0.0812  | 21.51040  | 0.3766      | 3.47E-06                  |           |
| Cathepsin O                                                                                                                       | rs146963690 | G           | T       | 0.0101  | 0.1322    | 22.32241    | 0.6246                    | 2.29E-06  |
|                                                                                                                                   | rs149159018 | G           | A       | 0.01105 | 0.134     | 27.55466    | 0.7034                    | 1.55E-07  |
|                                                                                                                                   | rs17288007  | G           | A       | 0.06381 | 0.0521    | 22.22190    | -0.2456                   | 2.45E-06  |
|                                                                                                                                   | rs181844705 | G           | A       | 0.02318 | 0.0905    | 23.76697    | 0.4412                    | 1.10E-06  |
|                                                                                                                                   | rs4297371   | C           | A       | 0.79306 | 0.0313    | 21.54977    | 0.1453                    | 3.55E-06  |
|                                                                                                                                   | rs78943701  | A           | G       | 0.01536 | 0.1025    | 21.83952    | -0.479                    | 2.95E-06  |
|                                                                                                                                   | rs2439803   | G           | A       | 0.15304 | 0.0351    | 25.22844    | 0.1763                    | 5.13E-07  |
|                                                                                                                                   | rs4076941   | C           | T       | 0.36872 | 0.0262    | 22.58063    | -0.1245                   | 2.14E-06  |
|                                                                                                                                   | rs10902420  | G           | A       | 0.89909 | 0.0432    | 23.56293    | -0.2097                   | 1.23E-06  |
|                                                                                                                                   | rs7140599   | C           | T       | 0.57698 | 0.0251    | 23.58631    | -0.1219                   | 1.17E-06  |
|                                                                                                                                   | rs1870736   | G           | C       | 0.42746 | 0.0249    | 24.08484    | 0.1222                    | 9.33E-07  |
|                                                                                                                                   | rs932172    | T           | C       | 0.10769 | 0.0401    | 22.80598    | 0.1915                    | 1.74E-06  |
| rs4843804                                                                                                                         | A           | G           | 0.0336  | 0.0673  | 21.54725  | -0.3124     | 3.47E-06                  |           |
| Cathepsin S                                                                                                                       | rs41271951  | G           | A       | 0.08349 | 0.0419    | 421.76807   | -0.8605                   | 7.08E-94  |
|                                                                                                                                   | rs6657328   | C           | G       | 0.7184  | 0.0283    | 20.81036    | -0.1291                   | 4.90E-06  |
|                                                                                                                                   | rs4581957   | A           | G       | 0.13414 | 0.0365    | 23.64890    | -0.1775                   | 1.15E-06  |
|                                                                                                                                   | rs13411643  | C           | T       | 0.13712 | 0.0364    | 25.30311    | 0.1831                    | 5.01E-07  |
|                                                                                                                                   | rs7614425   | A           | G       | 0.09254 | 0.0436    | 22.80282    | -0.2082                   | 1.82E-06  |
|                                                                                                                                   | rs13150189  | A           | G       | 0.21113 | 0.0306    | 25.85689    | 0.1556                    | 3.47E-07  |
|                                                                                                                                   | rs989576    | C           | T       | 0.29843 | 0.0278    | 22.10353    | 0.1307                    | 2.57E-06  |
|                                                                                                                                   | rs10516855  | C           | T       | 0.09552 | 0.0421    | 21.87395    | -0.1969                   | 2.95E-06  |
|                                                                                                                                   | rs113108135 | C           | G       | 0.06933 | 0.0491    | 22.88775    | 0.2349                    | 1.70E-06  |
|                                                                                                                                   | rs116623438 | C           | T       | 0.02023 | 0.0876    | 24.09510    | -0.43                     | 9.12E-07  |
|                                                                                                                                   | rs13212873  | C           | T       | 0.0116  | 0.117     | 21.47570    | 0.5422                    | 3.55E-06  |
|                                                                                                                                   | rs13196989  | T           | C       | 0.13099 | 0.0374    | 22.09503    | -0.1758                   | 2.57E-06  |
| rs2470994                                                                                                                         | A           | C           | 0.28081 | 0.0281  | 21.53488  | 0.1304      | 3.39E-06                  |           |
| rs529565                                                                                                                          | C           | T           | 0.31269 | 0.0266  | 24.43927  | -0.1315     | 7.76E-07                  |           |
| rs61870690                                                                                                                        | G           | A           | 0.04143 | 0.0684  | 24.50539  | -0.3386     | 7.24E-07                  |           |
| rs1060435                                                                                                                         | G           | A           | 0.39793 | 0.0251  | 26.45483  | -0.1291     | 2.75E-07                  |           |
| rs12804405                                                                                                                        | A           | G           | 0.01019 | 0.129   | 22.50730  | 0.612       | 2.09E-06                  |           |
| rs74804137                                                                                                                        | C           | T           | 0.01757 | 0.0987  | 27.52262  | -0.5178     | 1.58E-07                  |           |
| rs73099998                                                                                                                        | T           | C           | 0.20811 | 0.0308  | 22.47006  | -0.146      | 2.19E-06                  |           |
| rs77792819                                                                                                                        | G           | A           | 0.04096 | 0.0661  | 22.66682  | 0.3147      | 1.95E-06                  |           |
| rs1022239                                                                                                                         | T           | A           | 0.58887 | 0.025   | 21.41838  | 0.1157      | 3.72E-06                  |           |
| rs4313886                                                                                                                         | C           | T           | 0.13446 | 0.0365  | 21.36212  | 0.1687      | 3.89E-06                  |           |
| rs78767885                                                                                                                        | C           | T           | 0.08725 | 0.0477  | 22.01321  | 0.2238      | 2.69E-06                  |           |
| rs118010753                                                                                                                       | C           | T           | 0.01437 | 0.1081  | 21.54815  | 0.5018      | 3.47E-06                  |           |
| Cathepsin L2                                                                                                                      | rs114113108 | C           | G       | 0.0129  | 0.1172    | 25.53181    | -0.5922                   | 4.37E-07  |
|                                                                                                                                   | rs13068566  | G           | A       | 0.46617 | 0.0247    | 21.94183    | 0.1157                    | 2.88E-06  |
|                                                                                                                                   | rs1523319   | G           | C       | 0.28541 | 0.0279    | 21.44453    | -0.1292                   | 3.55E-06  |
|                                                                                                                                   | rs151179824 | A           | G       | 0.02158 | 0.0943    | 22.25878    | 0.4449                    | 2.34E-06  |
|                                                                                                                                   | rs7669728   | C           | T       | 0.43633 | 0.0254    | 26.23537    | -0.1301                   | 3.09E-07  |
|                                                                                                                                   | rs116407656 | C           | T       | 0.02439 | 0.0856    | 21.98909    | 0.4014                    | 2.75E-06  |
|                                                                                                                                   | rs10817163  | A           | T       | 0.22045 | 0.0304    | 42.54987    | 0.1983                    | 7.08E-11  |
|                                                                                                                                   | rs7898416   | G           | A       | 0.0705  | 0.0489    | 21.68245    | -0.2277                   | 3.24E-06  |
|                                                                                                                                   | rs148608463 | A           | G       | 0.35415 | 0.0257    | 21.00992    | -0.1178                   | 4.57E-06  |
|                                                                                                                                   | rs117714361 | G           | A       | 0.02856 | 0.056     | 20.84961    | -0.3452                   | 4.90E-06  |
|                                                                                                                                   | rs2302837   | G           | A       | 0.92494 | 0.0498    | 26.03458    | -0.2541                   | 3.31E-07  |
|                                                                                                                                   | rs36128387  | T           | C       | 0.02261 | 0.0914    | 23.06942    | 0.439                     | 1.55E-06  |
| rs114675081                                                                                                                       | G           | A           | 0.01467 | 0.1075  | 22.97753  | 0.5153      | 1.66E-06                  |           |
| rs148201372                                                                                                                       | T           | A           | 0.01546 | 0.1063  | 23.81036  | -0.5187     | 1.05E-06                  |           |
| rs7656806                                                                                                                         | C           | A           | 0.51592 | 0.0245  | 27.12496  | -0.1276     | 1.86E-07                  |           |
| rs1135945                                                                                                                         | A           | G           | 0.20839 | 0.0301  | 21.17223  | 0.1385      | 4.17E-06                  |           |
| rs770149                                                                                                                          | G           | A           | 0.64195 | 0.0265  | 21.93067  | -0.1821     | 2.82E-06                  |           |
| rs298724                                                                                                                          | C           | T           | 0.05507 | 0.0538  | 21.28330  | 0.2482      | 3.98E-06                  |           |
| rs10761760                                                                                                                        | C           | A           | 0.44944 | 0.0258  | 26.21599  | 0.1321      | 3.09E-07                  |           |
| rs116920068                                                                                                                       | A           | G           | 0.0289  | 0.0749  | 21.81102  | -0.3498     | 3.02E-06                  |           |
| rs4761709                                                                                                                         | G           | A           | 0.40882 | 0.0249  | 23.92742  | 0.1218      | 1.00E-06                  |           |
| rs10745925                                                                                                                        | C           | T           | 0.29402 | 0.0266  | 185.61501 | -0.3624     | 2.29E-42                  |           |
| rs67845377                                                                                                                        | A           | C           | 0.13855 | 0.0362  | 21.49379  | 0.1675      | 3.72E-06                  |           |
| rs148370779                                                                                                                       | T           | C           | 0.01316 | 0.1105  | 25.61184  | -1.7632     | 2.57E-57                  |           |

SNP: single nucleotide polymorphism; EA: effect Allele; OA: other Allele; EAF: effect allele frequency; SE: standard error.



Supplementary Table 2: Test for heterogeneity in the validation data.

| Supplementary Table 2   Heterogeneity test between nine different cathepsins and ovarian malignancies and their pathological subtypes in validation datasets |                           |                  |      |         |
|--------------------------------------------------------------------------------------------------------------------------------------------------------------|---------------------------|------------------|------|---------|
| cancer                                                                                                                                                       | Outcome and method        | Cochran's Q test |      |         |
|                                                                                                                                                              |                           | Q                | Q_df | Q-value |
| Ovarian cancer                                                                                                                                               |                           |                  |      |         |
|                                                                                                                                                              | Cathepsin B               |                  |      |         |
|                                                                                                                                                              | Inverse variance weighted | 13.40199         | 18   | 0.76716 |
|                                                                                                                                                              | MR Egger                  | 13.31804         | 17   | 0.71465 |
|                                                                                                                                                              | Cathepsin E               |                  |      |         |
|                                                                                                                                                              | Inverse variance weighted | 13.84406         | 10   | 0.18022 |
|                                                                                                                                                              | MR Egger                  | 12.93914         | 9    | 0.16538 |
|                                                                                                                                                              | Cathepsin F               |                  |      |         |
|                                                                                                                                                              | Inverse variance weighted | 13.27104         | 11   | 0.27598 |
|                                                                                                                                                              | MR Egger                  | 13.25342         | 10   | 0.20985 |
|                                                                                                                                                              | Cathepsin G               |                  |      |         |
|                                                                                                                                                              | Inverse variance weighted | 4.66857          | 11   | 0.94615 |
|                                                                                                                                                              | MR Egger                  | 4.44379          | 10   | 0.92511 |
|                                                                                                                                                              | Cathepsin H               |                  |      |         |
|                                                                                                                                                              | Inverse variance weighted | 6.04229          | 10   | 0.81170 |
|                                                                                                                                                              | MR Egger                  | 4.92200          | 9    | 0.84105 |
|                                                                                                                                                              | Cathepsin O               |                  |      |         |
|                                                                                                                                                              | Inverse variance weighted | 6.74456          | 10   | 0.74932 |
|                                                                                                                                                              | MR Egger                  | 4.97193          | 9    | 0.83675 |
|                                                                                                                                                              | Cathepsin S               |                  |      |         |
|                                                                                                                                                              | Inverse variance weighted | 14.38201         | 19   | 0.76098 |
|                                                                                                                                                              | MR Egger                  | 13.86880         | 18   | 0.73760 |
|                                                                                                                                                              | Cathepsin L2              |                  |      |         |
|                                                                                                                                                              | Inverse variance weighted | 9.25204          | 8    | 0.32148 |
|                                                                                                                                                              | MR Egger                  | 7.97875          | 7    | 0.33447 |
|                                                                                                                                                              | Cathepsin Z               |                  |      |         |
|                                                                                                                                                              | Inverse variance weighted | 8.34039          | 10   | 0.59563 |
|                                                                                                                                                              | MR Egger                  | 4.70412          | 9    | 0.85930 |
| Low grade serous ovarian cancer                                                                                                                              |                           |                  |      |         |
|                                                                                                                                                              | Cathepsin B               |                  |      |         |
|                                                                                                                                                              | Inverse variance weighted | 12.40564         | 18   | 0.82560 |
|                                                                                                                                                              | MR Egger                  | 12.40562         | 17   | 0.77498 |
|                                                                                                                                                              | Cathepsin E               |                  |      |         |
|                                                                                                                                                              | Inverse variance weighted | 18.62560         | 10   | 0.04528 |
|                                                                                                                                                              | MR Egger                  | 18.60161         | 9    | 0.02880 |
|                                                                                                                                                              | Cathepsin F               |                  |      |         |
|                                                                                                                                                              | Inverse variance weighted | 32.41770         | 11   | 0.00065 |
|                                                                                                                                                              | MR Egger                  | 29.20733         | 10   | 0.00115 |

|                                  |                           |          |    |         |
|----------------------------------|---------------------------|----------|----|---------|
|                                  | Cathepsin G               |          |    |         |
|                                  | Inverse variance weighted | 14.34602 | 11 | 0.21443 |
|                                  | MR Egger                  | 13.94174 | 10 | 0.17567 |
|                                  | Cathepsin H               |          |    |         |
|                                  | Inverse variance weighted | 14.12339 | 10 | 0.16744 |
|                                  | MR Egger                  | 11.28096 | 9  | 0.25694 |
|                                  | Cathepsin O               |          |    |         |
|                                  | Inverse variance weighted | 4.99157  | 10 | 0.89174 |
|                                  | MR Egger                  | 4.43980  | 9  | 0.88016 |
|                                  | Cathepsin S               |          |    |         |
|                                  | Inverse variance weighted | 12.85784 | 19 | 0.84577 |
|                                  | MR Egger                  | 12.50228 | 18 | 0.82025 |
|                                  | Cathepsin L2              |          |    |         |
|                                  | Inverse variance weighted | 4.40233  | 8  | 0.81912 |
|                                  | MR Egger                  | 3.40632  | 7  | 0.84505 |
|                                  | Cathepsin Z               |          |    |         |
|                                  | Inverse variance weighted | 7.40082  | 10 | 0.68714 |
|                                  | MR Egger                  | 5.39602  | 9  | 0.79851 |
| High grade serous ovarian cancer |                           |          |    |         |
|                                  | Cathepsin B               |          |    |         |
|                                  | Inverse variance weighted | 13.79456 | 18 | 0.74238 |
|                                  | MR Egger                  | 13.71396 | 17 | 0.68724 |
|                                  | Cathepsin E               |          |    |         |
|                                  | Inverse variance weighted | 10.30649 | 10 | 0.41403 |
|                                  | MR Egger                  | 9.31972  | 9  | 0.40830 |
|                                  | Cathepsin F               |          |    |         |
|                                  | Inverse variance weighted | 9.63139  | 11 | 0.56382 |
|                                  | MR Egger                  | 8.80097  | 10 | 0.55109 |
|                                  | Cathepsin G               |          |    |         |
|                                  | Inverse variance weighted | 3.59318  | 11 | 0.98035 |
|                                  | MR Egger                  | 3.56612  | 10 | 0.96481 |
|                                  | Cathepsin H               |          |    |         |
|                                  | Inverse variance weighted | 5.61472  | 10 | 0.84653 |
|                                  | MR Egger                  | 5.58734  | 9  | 0.78040 |
|                                  | Cathepsin O               |          |    |         |
|                                  | Inverse variance weighted | 5.95830  | 10 | 0.81875 |
|                                  | MR Egger                  | 5.11562  | 9  | 0.82411 |
|                                  | Cathepsin S               |          |    |         |
|                                  | Inverse variance weighted | 13.65977 | 19 | 0.80315 |
|                                  | MR Egger                  | 13.37310 | 18 | 0.76895 |
|                                  | Cathepsin L2              |          |    |         |
|                                  | Inverse variance weighted | 8.27024  | 8  | 0.40753 |
|                                  | MR Egger                  | 6.91071  | 7  | 0.43824 |
|                                  | Cathepsin Z               |          |    |         |
|                                  | Inverse variance weighted | 10.27139 | 10 | 0.41701 |
|                                  | MR Egger                  | 8.49160  | 9  | 0.48546 |

|                           |                           |          |    |         |
|---------------------------|---------------------------|----------|----|---------|
| Clear cell ovarian cancer |                           |          |    |         |
|                           | Cathepsin B               |          |    |         |
|                           | Inverse variance weighted | 12.31638 | 18 | 0.83048 |
|                           | MR Egger                  | 11.74121 | 17 | 0.81555 |
|                           | Cathepsin E               |          |    |         |
|                           | Inverse variance weighted | 7.35104  | 10 | 0.69194 |
|                           | MR Egger                  | 6.17060  | 9  | 0.72273 |
|                           | Cathepsin F               |          |    |         |
|                           | Inverse variance weighted | 11.30262 | 11 | 0.41827 |
|                           | MR Egger                  | 8.25662  | 10 | 0.60379 |
|                           | Cathepsin G               |          |    |         |
|                           | Inverse variance weighted | 5.81392  | 11 | 0.88549 |
|                           | MR Egger                  | 5.80982  | 10 | 0.83098 |
|                           | Cathepsin H               |          |    |         |
|                           | Inverse variance weighted | 10.59523 | 10 | 0.38991 |
|                           | MR Egger                  | 10.52474 | 9  | 0.30970 |
|                           | Cathepsin O               |          |    |         |
|                           | Inverse variance weighted | 8.85820  | 10 | 0.54561 |
|                           | MR Egger                  | 8.27194  | 9  | 0.50699 |
|                           | Cathepsin S               |          |    |         |
|                           | Inverse variance weighted | 9.88805  | 19 | 0.95565 |
|                           | MR Egger                  | 9.85515  | 18 | 0.93653 |
|                           | Cathepsin L2              |          |    |         |
|                           | Inverse variance weighted | 16.56615 | 8  | 0.03496 |
|                           | MR Egger                  | 16.14105 | 7  | 0.02386 |
|                           | Cathepsin Z               |          |    |         |
|                           | Inverse variance weighted | 9.35587  | 10 | 0.49870 |
|                           | MR Egger                  | 7.86562  | 9  | 0.54774 |
| Mucinous ovarian cancer   |                           |          |    |         |
|                           | Cathepsin B               |          |    |         |
|                           | Inverse variance weighted | 21.85762 | 18 | 0.23837 |
|                           | MR Egger                  | 17.87970 | 17 | 0.39647 |
|                           | Cathepsin E               |          |    |         |
|                           | Inverse variance weighted | 5.79454  | 10 | 0.83222 |
|                           | MR Egger                  | 5.78709  | 9  | 0.76102 |
|                           | Cathepsin F               |          |    |         |
|                           | Inverse variance weighted | 22.32051 | 11 | 0.02200 |
|                           | MR Egger                  | 21.97851 | 10 | 0.01521 |
|                           | Cathepsin G               |          |    |         |
|                           | Inverse variance weighted | 15.09585 | 11 | 0.17815 |
|                           | MR Egger                  | 11.47075 | 10 | 0.32204 |
|                           | Cathepsin H               |          |    |         |
|                           | Inverse variance weighted | 5.49411  | 10 | 0.85583 |
|                           | MR Egger                  | 5.30369  | 9  | 0.80707 |
|                           | Cathepsin O               |          |    |         |
|                           | Inverse variance weighted | 14.37338 | 10 | 0.15663 |

|                                                   |                           |          |    |         |
|---------------------------------------------------|---------------------------|----------|----|---------|
|                                                   | MR Egger                  | 4.67767  | 9  | 0.86145 |
|                                                   | Cathepsin S               |          |    |         |
|                                                   | Inverse variance weighted | 16.92769 | 19 | 0.59477 |
|                                                   | MR Egger                  | 15.82479 | 18 | 0.60477 |
|                                                   | Cathepsin L2              |          |    |         |
|                                                   | Inverse variance weighted | 5.73707  | 8  | 0.67666 |
|                                                   | MR Egger                  | 5.73701  | 7  | 0.57077 |
|                                                   | Cathepsin Z               |          |    |         |
|                                                   | Inverse variance weighted | 9.86108  | 10 | 0.45276 |
|                                                   | MR Egger                  | 9.75765  | 9  | 0.37046 |
| Endometrioid ovarian cancer                       |                           |          |    |         |
|                                                   | Cathepsin B               |          |    |         |
|                                                   | Inverse variance weighted | 21.22280 | 18 | 0.26832 |
|                                                   | MR Egger                  | 20.95664 | 17 | 0.22824 |
|                                                   | Cathepsin E               |          |    |         |
|                                                   | Inverse variance weighted | 17.31102 | 10 | 0.06776 |
|                                                   | MR Egger                  | 15.83728 | 9  | 0.07036 |
|                                                   | Cathepsin F               |          |    |         |
|                                                   | Inverse variance weighted | 20.43333 | 11 | 0.03974 |
|                                                   | MR Egger                  | 20.14682 | 10 | 0.02789 |
|                                                   | Cathepsin G               |          |    |         |
|                                                   | Inverse variance weighted | 15.29462 | 11 | 0.16940 |
|                                                   | MR Egger                  | 13.43069 | 10 | 0.20058 |
|                                                   | Cathepsin H               |          |    |         |
|                                                   | Inverse variance weighted | 7.44367  | 10 | 0.68300 |
|                                                   | MR Egger                  | 3.44745  | 9  | 0.94389 |
|                                                   | Cathepsin O               |          |    |         |
|                                                   | Inverse variance weighted | 17.76941 | 10 | 0.05898 |
|                                                   | MR Egger                  | 17.28726 | 9  | 0.04440 |
|                                                   | Cathepsin S               |          |    |         |
|                                                   | Inverse variance weighted | 28.23953 | 19 | 0.07893 |
|                                                   | MR Egger                  | 27.07740 | 18 | 0.07756 |
|                                                   | Cathepsin L2              |          |    |         |
|                                                   | Inverse variance weighted | 12.34885 | 8  | 0.13630 |
|                                                   | MR Egger                  | 12.14389 | 7  | 0.09593 |
|                                                   | Cathepsin Z               |          |    |         |
|                                                   | Inverse variance weighted | 17.33317 | 10 | 0.06731 |
|                                                   | MR Egger                  | 14.06638 | 9  | 0.11998 |
| Q: Cochran's Q statistic; df: degrees of freedom. |                           |          |    |         |

Supplementary Table 3: Pleiotropic test of the MR-Egger intercept.



| Supplementary Table 3  pleiotropy test between cathepsins family and ovarian cancer and their pathological subtypes |              |                 |        |        |
|---------------------------------------------------------------------------------------------------------------------|--------------|-----------------|--------|--------|
| cancer                                                                                                              | cathepsins   | egger_intercept |        |        |
|                                                                                                                     |              | egger_intercept | se     | pval   |
| Ovarian cancer                                                                                                      |              |                 |        |        |
|                                                                                                                     | Cathepsin B  | -0.00400        | 0.0138 | 0.7755 |
|                                                                                                                     | Cathepsin E  | -0.01203        | 0.0152 | 0.4480 |
|                                                                                                                     | Cathepsin F  | -0.00201        | 0.0175 | 0.9105 |
|                                                                                                                     | Cathepsin G  | 0.00758         | 0.0160 | 0.6456 |
|                                                                                                                     | Cathepsin H  | -0.00963        | 0.0091 | 0.3174 |
|                                                                                                                     | Cathepsin O  | 0.01847         | 0.0139 | 0.2158 |
|                                                                                                                     | Cathepsin S  | 0.00549         | 0.0077 | 0.4830 |
|                                                                                                                     | Cathepsin L2 | -0.0179         | 0.0169 | 0.3257 |
|                                                                                                                     | Cathepsin Z  | 0.01829         | 0.0096 | 0.0889 |
| Low grade serous ovarian cancer                                                                                     |              |                 |        |        |
|                                                                                                                     | Cathepsin B  | 0.00014         | 0.0299 | 0.9962 |
|                                                                                                                     | Cathepsin E  | -0.00426        | 0.0396 | 0.9166 |
|                                                                                                                     | Cathepsin F  | 0.05903         | 0.0563 | 0.3191 |
|                                                                                                                     | Cathepsin G  | 0.02232         | 0.0414 | 0.6020 |
|                                                                                                                     | Cathepsin H  | -0.0332         | 0.0221 | 0.1664 |
|                                                                                                                     | Cathepsin O  | 0.02233         | 0.0301 | 0.4765 |
|                                                                                                                     | Cathepsin S  | -0.00984        | 0.0165 | 0.5584 |
|                                                                                                                     | Cathepsin L2 | 0.0338          | 0.0339 | 0.3515 |
|                                                                                                                     | Cathepsin Z  | 0.02893         | 0.0204 | 0.1905 |
| High grade serous ovarian cancer                                                                                    |              |                 |        |        |
|                                                                                                                     | Cathepsin B  | -0.00466        | 0.0164 | 0.7799 |
|                                                                                                                     | Cathepsin E  | -0.01505        | 0.0154 | 0.3545 |
|                                                                                                                     | Cathepsin F  | -0.01644        | 0.0180 | 0.3836 |
|                                                                                                                     | Cathepsin G  | -0.00313        | 0.0190 | 0.8726 |
|                                                                                                                     | Cathepsin H  | -0.00179        | 0.0108 | 0.8722 |
|                                                                                                                     | Cathepsin O  | 0.01516         | 0.0165 | 0.3826 |
|                                                                                                                     | Cathepsin S  | 0.00487         | 0.0091 | 0.5989 |
|                                                                                                                     | Cathepsin L2 | -0.0219         | 0.0188 | 0.2818 |
|                                                                                                                     | Cathepsin Z  | 0.01523         | 0.0114 | 0.2150 |
| Clear cell ovarian cancer                                                                                           |              |                 |        |        |
|                                                                                                                     | Cathepsin B  | -0.03175        | 0.0419 | 0.4586 |
|                                                                                                                     | Cathepsin E  | -0.04109        | 0.0378 | 0.3055 |
|                                                                                                                     | Cathepsin F  | 0.07973         | 0.0457 | 0.1115 |
|                                                                                                                     | Cathepsin G  | 0.00311         | 0.0486 | 0.9502 |
|                                                                                                                     | Cathepsin H  | 0.00737         | 0.0300 | 0.8116 |
|                                                                                                                     | Cathepsin O  | 0.03245         | 0.0424 | 0.4635 |
|                                                                                                                     | Cathepsin S  | -0.00421        | 0.0232 | 0.8581 |
|                                                                                                                     | Cathepsin L2 | 0.03112         | 0.0725 | 0.6806 |
|                                                                                                                     | Cathepsin Z  | 0.03451         | 0.0283 | 0.2532 |
| Mucinous ovarian cancer                                                                                             |              |                 |        |        |
|                                                                                                                     | Cathepsin B  | 0.06254         | 0.0322 | 0.0685 |
|                                                                                                                     | Cathepsin E  | -0.00246        | 0.0285 | 0.9331 |
|                                                                                                                     | Cathepsin F  | -0.02006        | 0.0509 | 0.7015 |
|                                                                                                                     | Cathepsin G  | 0.06846         | 0.0385 | 0.1058 |
|                                                                                                                     | Cathepsin H  | -0.009          | 0.0206 | 0.6728 |
|                                                                                                                     | Cathepsin O  | 0.09994         | 0.0321 | 0.0124 |
|                                                                                                                     | Cathepsin S  | -0.01822        | 0.0173 | 0.3075 |
|                                                                                                                     | Cathepsin L2 | 0.00026         | 0.0367 | 0.9945 |
|                                                                                                                     | Cathepsin Z  | 0.00699         | 0.0226 | 0.7645 |
| Endometrioid ovarian cancer                                                                                         |              |                 |        |        |
|                                                                                                                     | Cathepsin B  | -0.01535        | 0.0330 | 0.6481 |
|                                                                                                                     | Cathepsin E  | -0.0326         | 0.0356 | 0.3840 |
|                                                                                                                     | Cathepsin F  | 0.01757         | 0.0466 | 0.7140 |
|                                                                                                                     | Cathepsin G  | 0.04703         | 0.0399 | 0.2661 |
|                                                                                                                     | Cathepsin H  | -0.03945        | 0.0197 | 0.0767 |
|                                                                                                                     | Cathepsin O  | 0.0206          | 0.0411 | 0.6284 |
|                                                                                                                     | Cathepsin S  | 0.01787         | 0.0203 | 0.3910 |
|                                                                                                                     | Cathepsin L2 | -0.01543        | 0.0449 | 0.7412 |
|                                                                                                                     | Cathepsin Z  | 0.03751         | 0.0260 | 0.1822 |



Supplementary Table 4: Inverse variance-weighted results of Multivariate analysis.

Supplementary Table 4 | Inverse variance weighted analysis of Multivariate analysis to estimate the relationship between cathepsin and ovarian cancer and its histological subtypes.

| cancer                           | Cathepsin    | bate   | Inverse variance weighted |        |         |
|----------------------------------|--------------|--------|---------------------------|--------|---------|
|                                  |              |        | 95%CI                     |        | p value |
| Ovarian cancer                   | Cathepsin B  | 0.020  | -0.026                    | 0.065  | 0.400   |
|                                  | Cathepsin E  | -0.021 | -0.090                    | 0.047  | 0.545   |
|                                  | Cathepsin F  | -0.001 | -0.062                    | 0.060  | 0.982   |
|                                  | Cathepsin G  | 0.036  | -0.028                    | 0.101  | 0.272   |
|                                  | Cathepsin H  | 0.030  | -0.005                    | 0.065  | 0.091   |
|                                  | Cathepsin O  | 0.033  | -0.052                    | 0.117  | 0.448   |
|                                  | Cathepsin S  | 0.012  | -0.030                    | 0.055  | 0.565   |
|                                  | Cathepsin L2 | -0.042 | -0.119                    | 0.035  | 0.286   |
|                                  | Cathepsin Z  | -0.054 | -0.116                    | 0.007  | 0.084   |
| Low grade serous ovarian cancer  | Cathepsin B  | 0.012  | -0.089                    | 0.113  | 0.820   |
|                                  | Cathepsin E  | 0.038  | -0.114                    | 0.189  | 0.624   |
|                                  | Cathepsin F  | -0.001 | -0.135                    | 0.134  | 0.993   |
|                                  | Cathepsin G  | 0.075  | -0.068                    | 0.218  | 0.305   |
|                                  | Cathepsin H  | 0.089  | 0.013                     | 0.166  | 0.022   |
|                                  | Cathepsin O  | 0.054  | -0.132                    | 0.240  | 0.569   |
|                                  | Cathepsin S  | 0.041  | -0.051                    | 0.134  | 0.382   |
|                                  | Cathepsin L2 | -0.210 | -0.381                    | -0.038 | 0.016   |
|                                  | Cathepsin Z  | -0.046 | -0.178                    | 0.086  | 0.498   |
| High grade serous ovarian cancer | Cathepsin B  | 0.015  | -0.039                    | 0.070  | 0.578   |
|                                  | Cathepsin E  | -0.059 | -0.141                    | 0.023  | 0.158   |
|                                  | Cathepsin F  | -0.029 | -0.101                    | 0.044  | 0.436   |
|                                  | Cathepsin G  | 0.073  | -0.004                    | 0.150  | 0.062   |
|                                  | Cathepsin H  | 0.010  | -0.031                    | 0.051  | 0.621   |
|                                  | Cathepsin O  | 0.057  | -0.044                    | 0.157  | 0.268   |
|                                  | Cathepsin S  | -0.009 | -0.059                    | 0.042  | 0.730   |
|                                  | Cathepsin L2 | -0.067 | -0.159                    | 0.025  | 0.155   |
|                                  | Cathepsin Z  | -0.052 | -0.125                    | 0.021  | 0.165   |
| Clear cell ovarian cancer        | Cathepsin B  | 0.017  | -0.122                    | 0.155  | 0.812   |
|                                  | Cathepsin E  | -0.004 | -0.210                    | 0.202  | 0.970   |
|                                  | Cathepsin F  | 0.066  | -0.117                    | 0.249  | 0.480   |
|                                  | Cathepsin G  | 0.104  | -0.093                    | 0.300  | 0.300   |
|                                  | Cathepsin H  | 0.110  | 0.005                     | 0.216  | 0.041   |
|                                  | Cathepsin O  | 0.150  | -0.106                    | 0.406  | 0.251   |
|                                  | Cathepsin S  | 0.033  | -0.096                    | 0.161  | 0.618   |
|                                  | Cathepsin L2 | -0.144 | -0.377                    | 0.090  | 0.227   |
|                                  | Cathepsin Z  | -0.100 | -0.279                    | 0.080  | 0.277   |
| Mucinous ovarian cancer          | Cathepsin B  | 0.003  | -0.108                    | 0.114  | 0.964   |
|                                  | Cathepsin E  | 0.104  | -0.061                    | 0.269  | 0.217   |
|                                  | Cathepsin F  | -0.021 | -0.169                    | 0.127  | 0.780   |
|                                  | Cathepsin G  | -0.055 | -0.210                    | 0.100  | 0.488   |
|                                  | Cathepsin H  | -0.042 | -0.124                    | 0.040  | 0.318   |
|                                  | Cathepsin O  | 0.024  | -0.182                    | 0.231  | 0.817   |
|                                  | Cathepsin S  | 0.005  | -0.098                    | 0.108  | 0.928   |
|                                  | Cathepsin L2 | -0.047 | -0.235                    | 0.141  | 0.623   |
|                                  | Cathepsin Z  | -0.049 | -0.198                    | 0.099  | 0.515   |
| Endometrioid ovarian cancer      | Cathepsin B  | 0.069  | -0.045                    | 0.182  | 0.236   |
|                                  | Cathepsin E  | 0.107  | -0.062                    | 0.276  | 0.214   |
|                                  | Cathepsin F  | 0.004  | -0.148                    | 0.156  | 0.958   |
|                                  | Cathepsin G  | -0.049 | -0.209                    | 0.112  | 0.551   |
|                                  | Cathepsin H  | 0.046  | -0.041                    | 0.133  | 0.297   |
|                                  | Cathepsin O  | -0.077 | -0.286                    | 0.132  | 0.470   |
|                                  | Cathepsin S  | 0.008  | -0.098                    | 0.114  | 0.886   |
|                                  | Cathepsin L2 | 0.095  | -0.097                    | 0.286  | 0.333   |
|                                  | Cathepsin Z  | 0.020  | -0.133                    | 0.173  | 0.799   |



Supplementary Table 5: Pleiotropic test of the MR-Egger intercept in Multivariate analysis.

| Supplementary Table 5   The multivariable MR-Egger method was used to analyze the level pleiotropy between cathepsin family and ovarian cancer and its subtypes |                 |         |
|-----------------------------------------------------------------------------------------------------------------------------------------------------------------|-----------------|---------|
| Exposure(intercept)<br>cancer                                                                                                                                   | MR-Egger method |         |
|                                                                                                                                                                 | Estimate        | p-value |
| Ovarian cancer                                                                                                                                                  | -0.004          | 0.194   |
| Low grade serous ovarian cancer                                                                                                                                 | 0.008           | 0.199   |
| High grade serous ovarian cancer                                                                                                                                | -0.004          | 0.204   |
| Clear cell ovarian cancer                                                                                                                                       | -0.001          | 0.899   |
| Mucinous ovarian cancer                                                                                                                                         | 0.001           | 0.934   |
| Endometrioid ovarian cancer                                                                                                                                     | -0.007          | 0.341   |

Supplementary Table 6: Causal association estimated by reverse Mendelian Randomization (MR) analyses.

Supplementary Table 6 | Causal association of cathepsins on ovarian cancer and its histological subtypes estimated by reverse MR analyses.

| cancer                           | Cathepsin    | nsnp | Inverse variance weighted |         |
|----------------------------------|--------------|------|---------------------------|---------|
|                                  |              |      | OR (95%CI)                | p value |
| Ovarian cancer                   |              |      |                           |         |
|                                  | Cathepsin B  | 40   | 0.924 (0.840-1.016)       | 0.104   |
|                                  | Cathepsin E  | 40   | 0.981 (0.892-1.079)       | 0.706   |
|                                  | Cathepsin F  | 40   | 1.046 (0.937-1.168)       | 0.416   |
|                                  | Cathepsin G  | 40   | 0.953 (0.866-1.048)       | 0.323   |
|                                  | Cathepsin H  | 40   | 1.007 (0.905-1.120)       | 0.894   |
|                                  | Cathepsin O  | 40   | 1.009 (0.918-1.110)       | 0.840   |
|                                  | Cathepsin S  | 40   | 0.966 (0.870-1.073)       | 0.528   |
|                                  | Cathepsin L2 | 40   | 0.992 (0.902-1.091)       | 0.879   |
|                                  | Cathepsin Z  | 40   | 1.044 (0.949-1.149)       | 0.366   |
| Low grade serous ovarian cancer  |              |      |                           |         |
|                                  | Cathepsin B  | 18   | 0.988 (0.911-1.071)       | 0.779   |
|                                  | Cathepsin E  | 18   | 0.968 (0.898-1.044)       | 0.408   |
|                                  | Cathepsin F  | 18   | 0.982 (0.919-1.049)       | 0.600   |
|                                  | Cathepsin G  | 18   | 0.973 (0.899-1.053)       | 0.500   |
|                                  | Cathepsin H  | 18   | 0.966 (0.904-1.032)       | 0.310   |
|                                  | Cathepsin O  | 18   | 0.938 (0.865-1.016)       | 0.117   |
|                                  | Cathepsin S  | 18   | 0.974 (0.911-1.040)       | 0.438   |
|                                  | Cathepsin L2 | 18   | 0.944 (0.875-1.018)       | 0.135   |
|                                  | Cathepsin Z  | 18   | 0.964 (0.902-1.030)       | 0.278   |
| High grade serous ovarian cancer |              |      |                           |         |
|                                  | Cathepsin B  | 34   | 0.926 (0.856-1.001)       | 0.0549  |
|                                  | Cathepsin E  | 34   | 0.988 (0.914-1.068)       | 0.768   |
|                                  | Cathepsin F  | 34   | 1.042 (0.964-1.126)       | 0.298   |
|                                  | Cathepsin G  | 34   | 0.946 (0.873-1.026)       | 0.188   |
|                                  | Cathepsin H  | 34   | 1.004 (0.928-1.086)       | 0.915   |
|                                  | Cathepsin O  | 34   | 1.004 (0.928-1.086)       | 0.913   |
|                                  | Cathepsin S  | 34   | 1.006 (0.923-1.095)       | 0.889   |
|                                  | Cathepsin L2 | 34   | 0.975 (0.902-1.055)       | 0.541   |
|                                  | Cathepsin Z  | 34   | 1.087 (1.005-1.175)       | 0.0356  |
| Clear cell ovarian cancer        |              |      |                           |         |
|                                  | Cathepsin B  | 14   | 1.011 (0.952-1.074)       | 0.701   |
|                                  | Cathepsin E  | 14   | 0.971 (0.920-1.024)       | 0.281   |
|                                  | Cathepsin F  | 14   | 0.991 (0.941-1.043)       | 0.733   |
|                                  | Cathepsin G  | 14   | 0.978 (0.929-1.030)       | 0.414   |
|                                  | Cathepsin H  | 14   | 0.998 (0.941-1.059)       | 0.973   |
|                                  | Cathepsin O  | 14   | 0.971 (0.911-1.034)       | 0.368   |
|                                  | Cathepsin S  | 14   | 0.996 (0.946-1.049)       | 0.896   |
|                                  | Cathepsin L2 | 14   | 0.965 (0.908-1.024)       | 0.243   |
|                                  | Cathepsin Z  | 14   | 0.992 (0.942-1.044)       | 0.771   |
| Mucinous ovarian cancer          |              |      |                           |         |
|                                  | Cathepsin B  | 26   | 1.003 (0.932-1.078)       | 0.934   |
|                                  | Cathepsin E  | 26   | 1.024 (0.959-1.093)       | 0.468   |
|                                  | Cathepsin F  | 26   | 0.996 (0.942-1.052)       | 0.887   |
|                                  | Cathepsin G  | 26   | 1.029 (0.967-1.094)       | 0.366   |
|                                  | Cathepsin H  | 26   | 0.994 (0.931-1.062)       | 0.869   |
|                                  | Cathepsin O  | 26   | 0.999 (0.939-1.063)       | 0.999   |
|                                  | Cathepsin S  | 26   | 1.012 (0.958-1.070)       | 0.653   |
|                                  | Cathepsin L2 | 26   | 1.020 (0.952-1.092)       | 0.566   |
|                                  | Cathepsin Z  | 26   | 1.017 (0.959-1.078)       | 0.571   |
| Endometrioid ovarian cancer      |              |      |                           |         |
|                                  | Cathepsin B  | 10   | 0.936 (0.850-1.030)       | 0.176   |
|                                  | Cathepsin E  | 10   | 1.021 (0.907-1.150)       | 0.718   |
|                                  | Cathepsin F  | 10   | 0.979 (0.885-1.084)       | 0.694   |
|                                  | Cathepsin G  | 10   | 0.994 (0.903-1.094)       | 0.906   |
|                                  | Cathepsin H  | 10   | 1.046 (0.930-1.177)       | 0.447   |
|                                  | Cathepsin O  | 10   | 1.027 (0.889-1.188)       | 0.710   |
|                                  | Cathepsin S  | 10   | 0.878 (0.798-0.966)       | 0.00803 |
|                                  | Cathepsin L2 | 10   | 1.044 (0.935-1.165)       | 0.437   |
|                                  | Cathepsin Z  | 10   | 1.022 (0.906-1.153)       | 0.719   |





Supplementary Table 7: Calculated values of the statistical power.

| Supplementary table 7   The calculated value of power |              |      |            |       |
|-------------------------------------------------------|--------------|------|------------|-------|
| cancer                                                | Cathepsin    | nsnp | OR (95%CI) | power |
| Ovarian cancer                                        | Cathepsin B  | 19   | 1.026      | 0.32  |
|                                                       | Cathepsin E  | 11   | 0.919      | 0.84  |
|                                                       | Cathepsin F  | 12   | 0.993      | 0.07  |
|                                                       | Cathepsin G  | 12   | 1.033      | 0.28  |
|                                                       | Cathepsin H  | 11   | 1.032      | 0.65  |
|                                                       | Cathepsin O  | 11   | 0.993      | 0.06  |
|                                                       | Cathepsin S  | 20   | 0.995      | 0.06  |
|                                                       | Cathepsin L2 | 9    | 0.984      | 0.09  |
|                                                       | Cathepsin Z  | 11   | 0.944      | 0.92  |
| Low grade serous ovarian cancer                       | Cathepsin B  | 19   | 0.997      | 0.05  |
|                                                       | Cathepsin E  | 11   | 1.026      | 0.18  |
|                                                       | Cathepsin F  | 12   | 0.943      | 0.97  |
|                                                       | Cathepsin G  | 12   | 1.075      | 0.94  |
|                                                       | Cathepsin H  | 11   | 1.057      | 1     |
|                                                       | Cathepsin O  | 11   | 1.016      | 0.11  |
|                                                       | Cathepsin S  | 20   | 0.999      | 0.05  |
|                                                       | Cathepsin L2 | 9    | 0.803      | 1     |
|                                                       | Cathepsin Z  | 11   | 0.951      | 0.93  |
| High grade serous ovarian cancer                      | Cathepsin B  | 19   | 1.017      | 0.12  |
|                                                       | Cathepsin E  | 11   | 0.893      | 0.87  |
|                                                       | Cathepsin F  | 12   | 0.979      | 0.16  |
|                                                       | Cathepsin G  | 12   | 1.045      | 0.32  |
|                                                       | Cathepsin H  | 11   | 1.015      | 0.14  |
|                                                       | Cathepsin O  | 11   | 1.016      | 0.08  |
|                                                       | Cathepsin S  | 20   | 0.987      | 0.11  |
|                                                       | Cathepsin L2 | 9    | 0.946      | 0.37  |
|                                                       | Cathepsin Z  | 11   | 0.926      | 0.94  |
| Clear cell ovarian cancer                             | Cathepsin B  | 19   | 1.034      | 0.09  |
|                                                       | Cathepsin E  | 11   | 0.887      | 0.21  |
|                                                       | Cathepsin F  | 12   | 1.010      | 0.05  |
|                                                       | Cathepsin G  | 12   | 1.133      | 0.36  |
|                                                       | Cathepsin H  | 11   | 1.149      | 0.89  |
|                                                       | Cathepsin O  | 11   | 0.959      | 0.08  |
|                                                       | Cathepsin S  | 20   | 1.023      | 0.07  |
|                                                       | Cathepsin L2 | 9    | 0.980      | 0.06  |
|                                                       | Cathepsin Z  | 11   | 0.998      | 0.05  |
| Mucinous ovarian cancer                               | Cathepsin B  | 19   | 1.031      | 0.11  |
|                                                       | Cathepsin E  | 11   | 1.066      | 0.15  |
|                                                       | Cathepsin F  | 12   | 0.937      | 0.29  |
|                                                       | Cathepsin G  | 12   | 0.934      | 0.19  |
|                                                       | Cathepsin H  | 11   | 0.955      | 0.26  |
|                                                       | Cathepsin O  | 11   | 0.912      | 0.28  |
|                                                       | Cathepsin S  | 20   | 0.956      | 0.21  |
|                                                       | Cathepsin L2 | 9    | 0.957      | 0.1   |
|                                                       | Cathepsin Z  | 11   | 0.960      | 0.15  |
| Endometrioid ovarian cancer                           | Cathepsin B  | 19   | 1.074      | 0.41  |
|                                                       | Cathepsin E  | 11   | 1.039      | 0.09  |
|                                                       | Cathepsin F  | 12   | 1.037      | 0.14  |
|                                                       | Cathepsin G  | 12   | 1.021      | 0.06  |
|                                                       | Cathepsin H  | 11   | 1.033      | 0.17  |
|                                                       | Cathepsin O  | 11   | 0.949      | 0.13  |
|                                                       | Cathepsin S  | 20   | 0.997      | 0.05  |
|                                                       | Cathepsin L2 | 9    | 1.082      | 0.24  |
|                                                       | Cathepsin Z  | 11   | 1.008      | 0.05  |
