# Supplementary material for: Mendelian randomization analysis to explore the relationship between cathepsins and malignant ovarian tumors
Source: PubMed Central journal article supplement — Medicine (Baltimore). 2024 Nov 15;103(46):e40219. doi: 10.1097/MD.0000000000040219 (PMC11575957; doi:10.1097/md.0000000000040219), 2024-11-15

Supplementary Figure 1: Mendelian Randomization (MR) leave-one-out sensitivity analysis for the causal effect of cathepsin E on ovarian cancer.

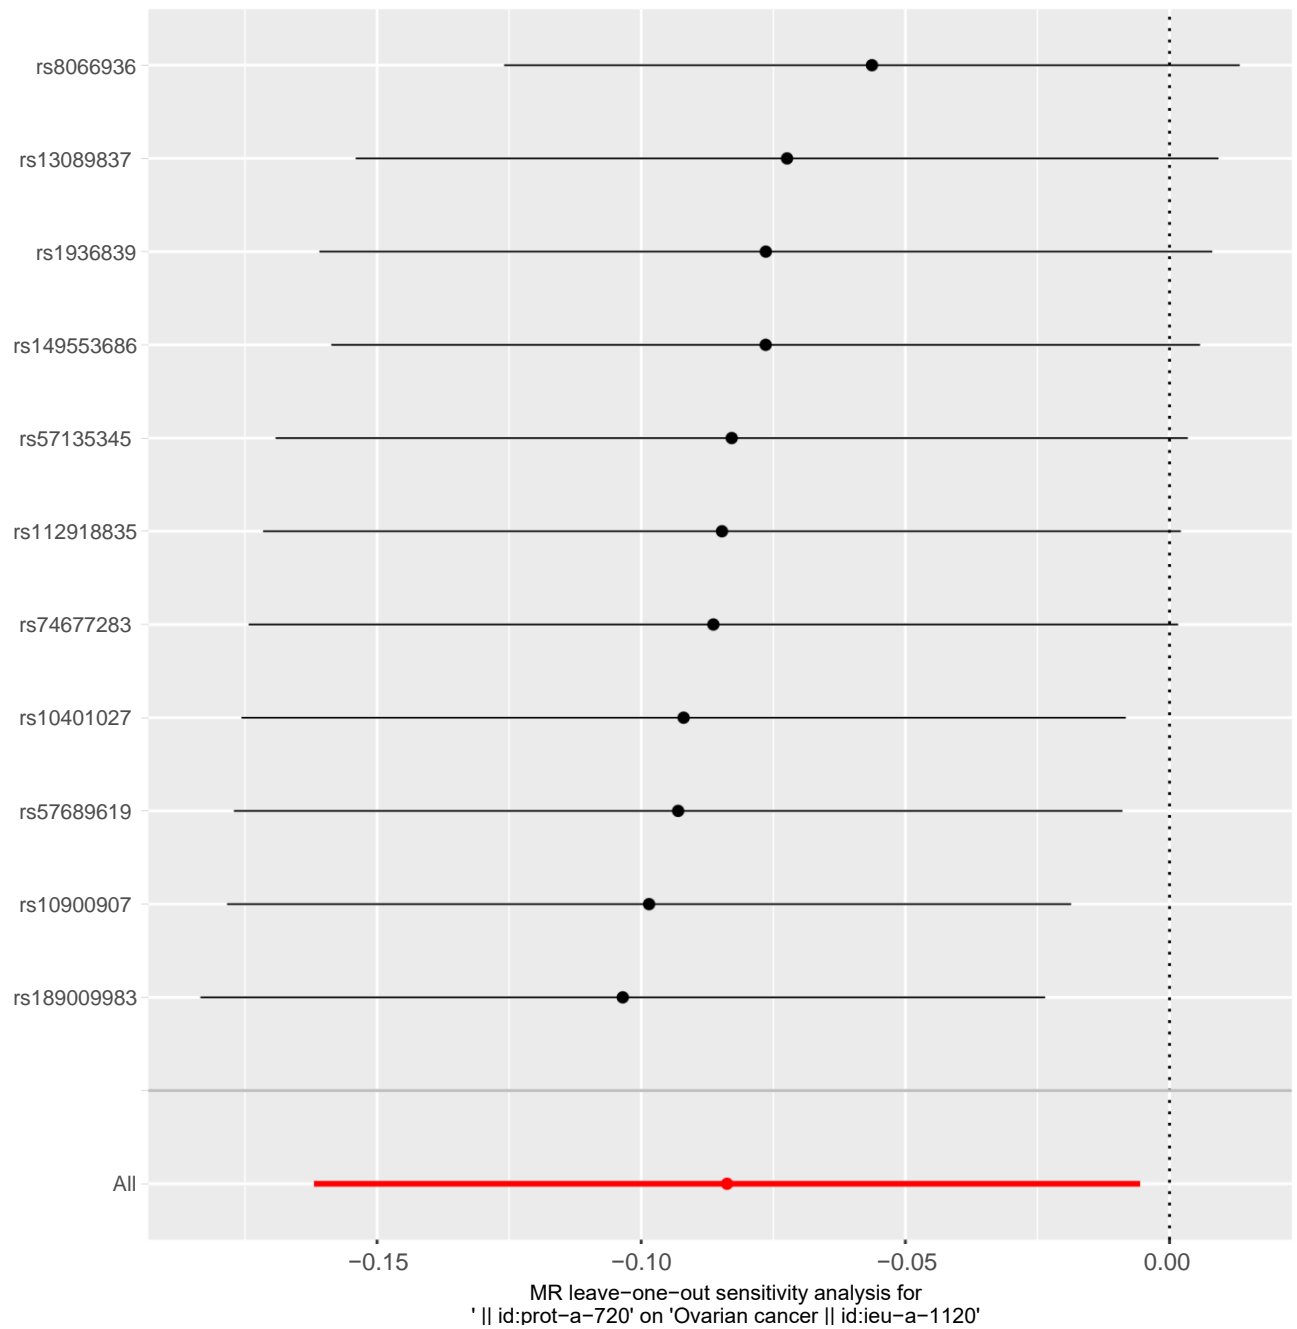

Supplementary Figure 2: Mendelian Randomization (MR) leave-one-out sensitivity analysis for cathepsin Z on Ovarian cancer.

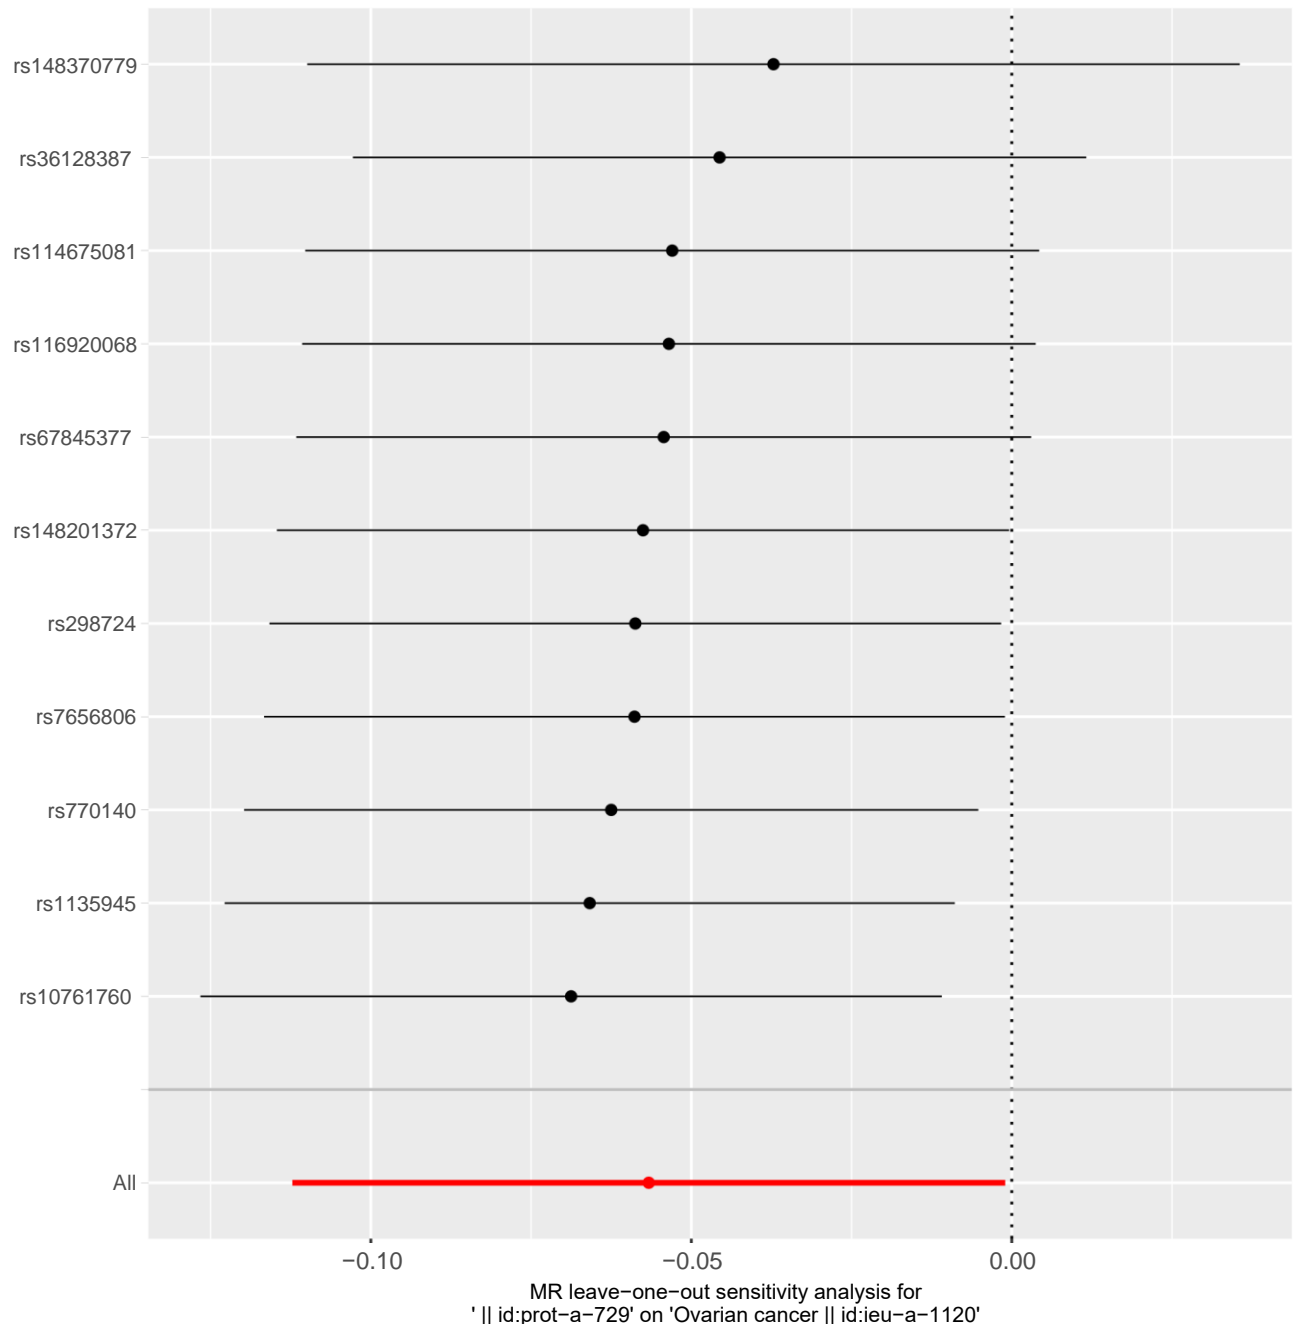

Supplementary Figure 3: Mendelian Randomization (MR) leave-one-out sensitivity analysis for the causal effect of cathepsin L2 on low-grade serous ovarian cancer.

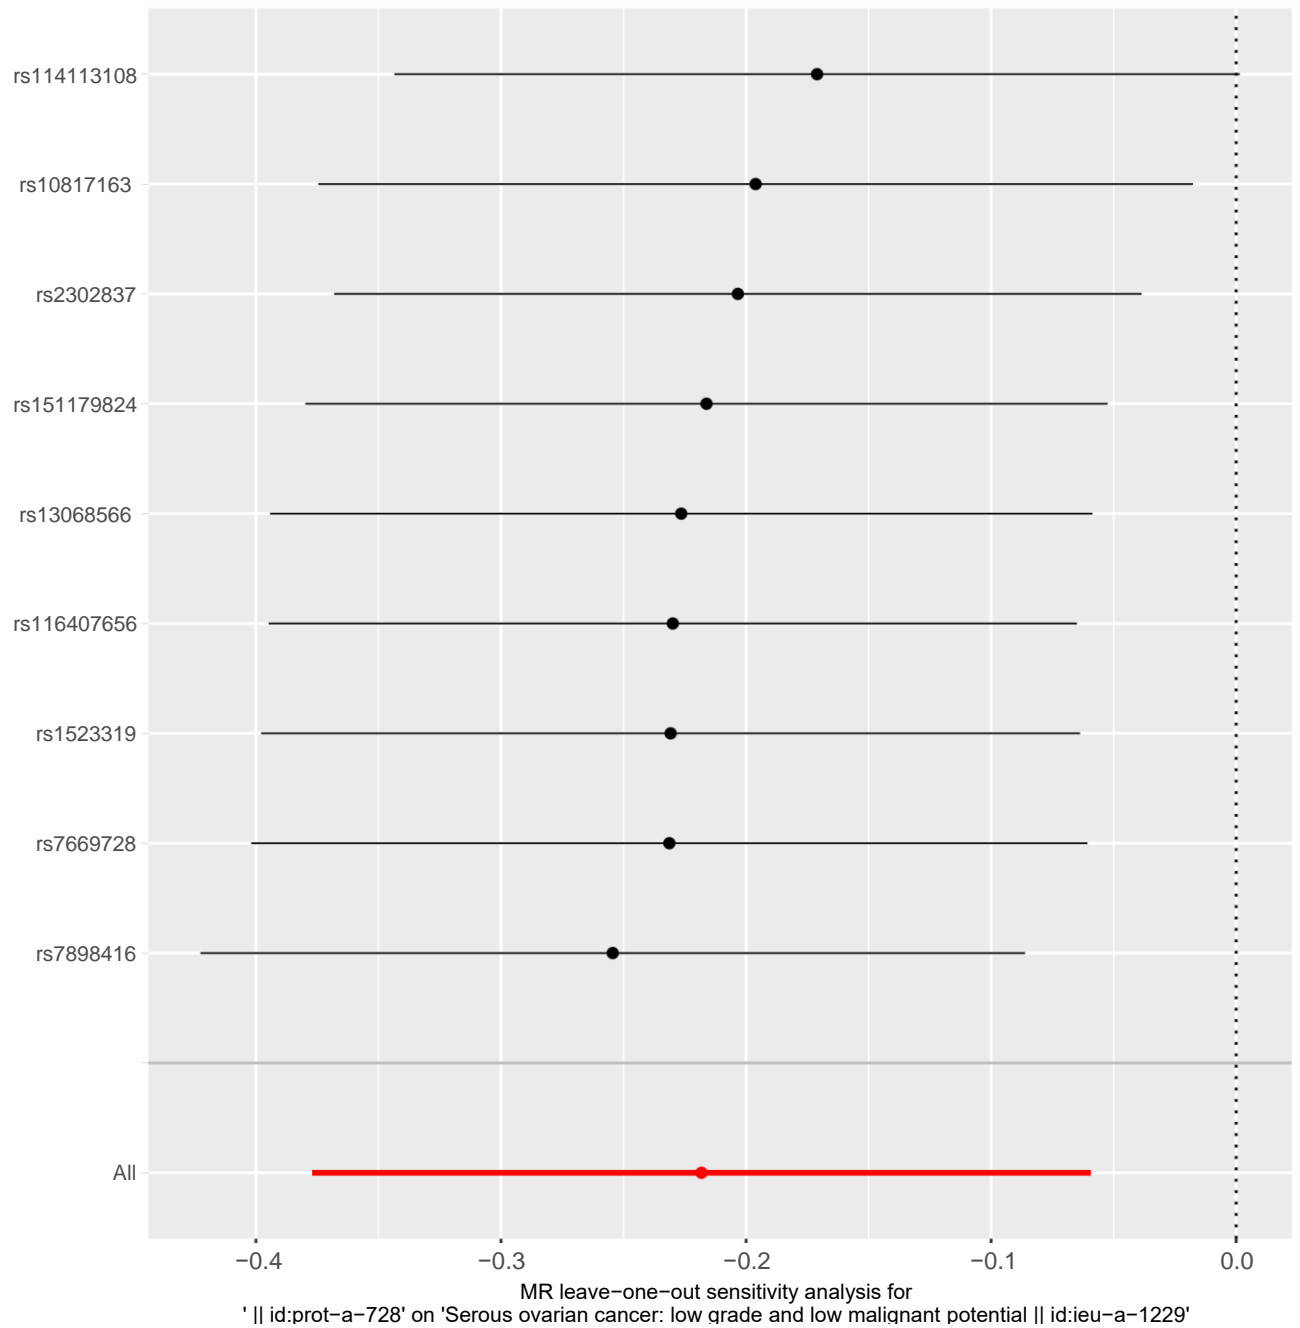

Supplementary Figure 4: Mendelian Randomization (MR) leave-one-out sensitivity analysis for cathepsin E on high- grade serous cancer.

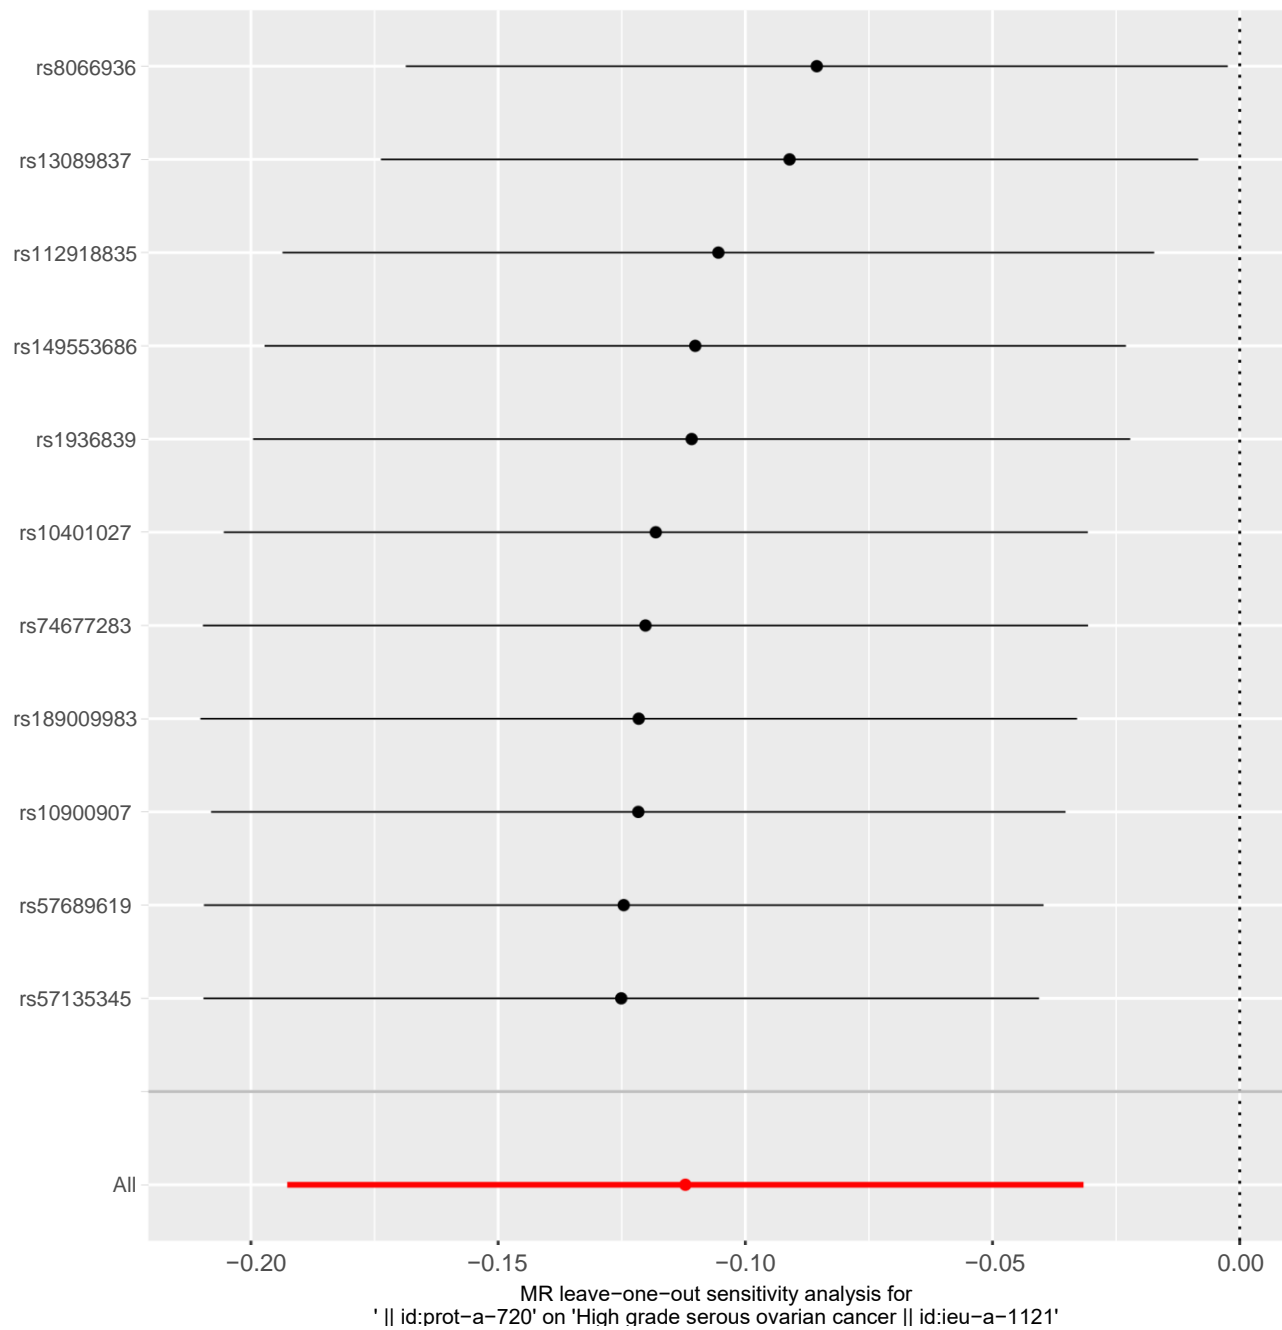

Supplementary Figure 5: Mendelian Randomization (MR) leave-one-out sensitivity analysis for cathepsin Z on high-grade serous cancer.

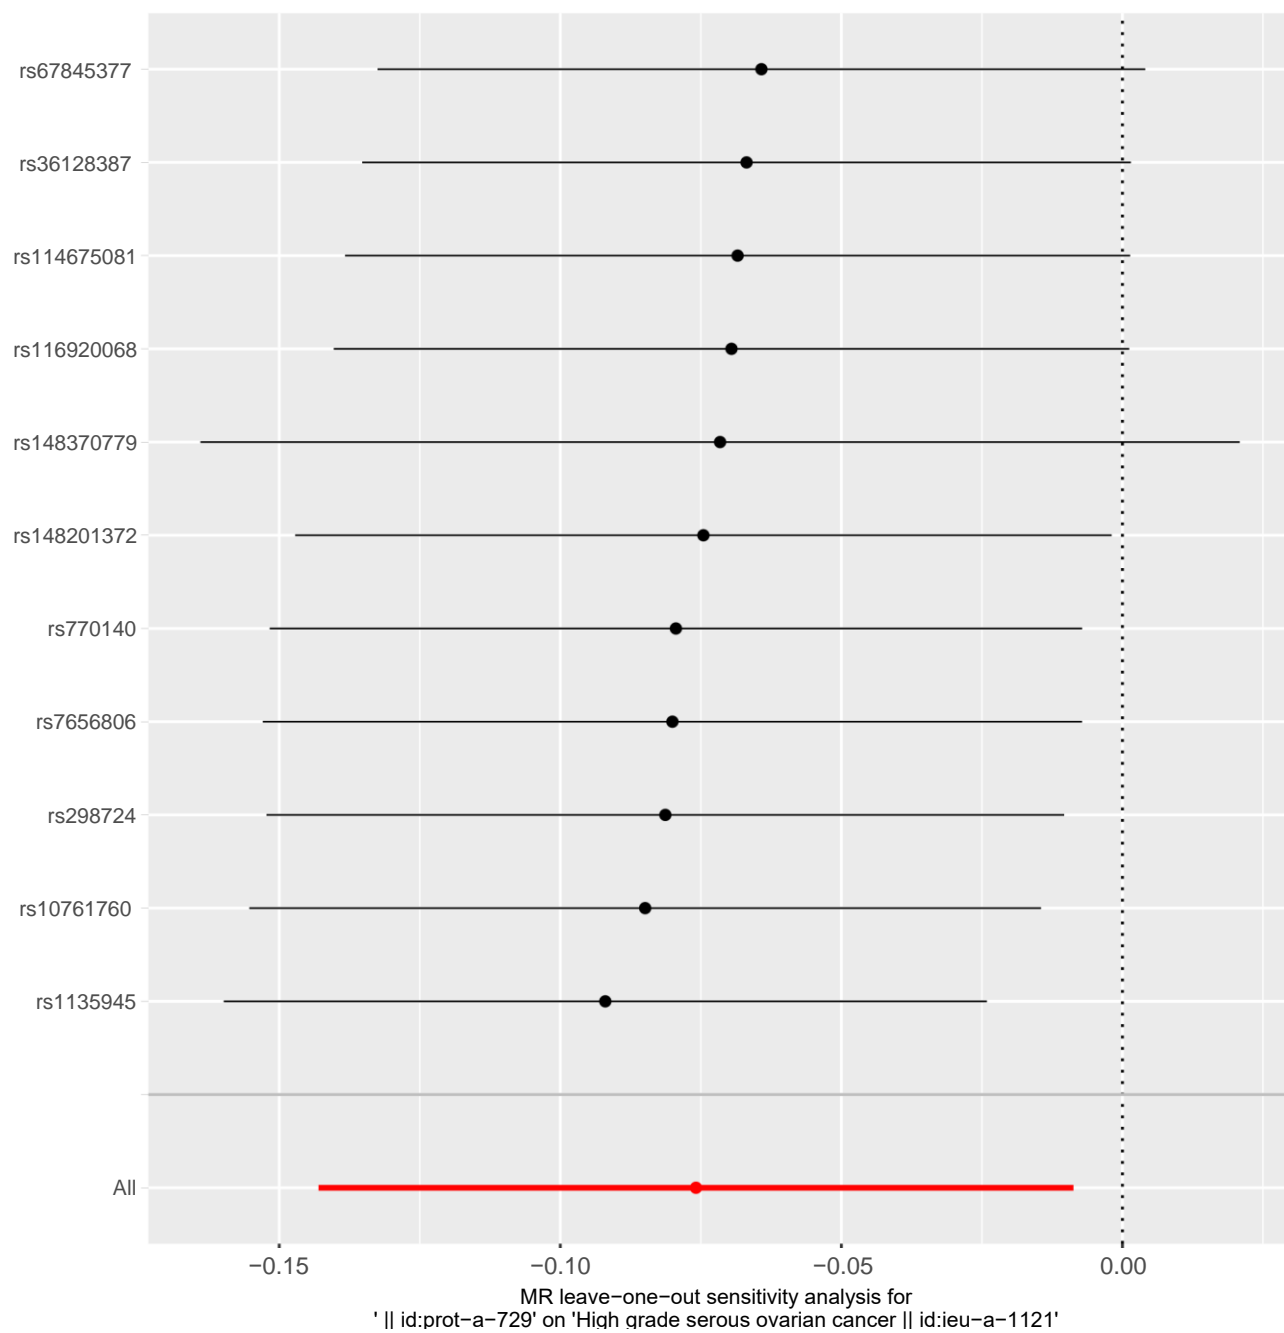

Supplementary Figure 6: Mendelian Randomization (MR) leave-one-out sensitivity analysis for the causal effect of cathepsin H on clear cell ovarian cancer.

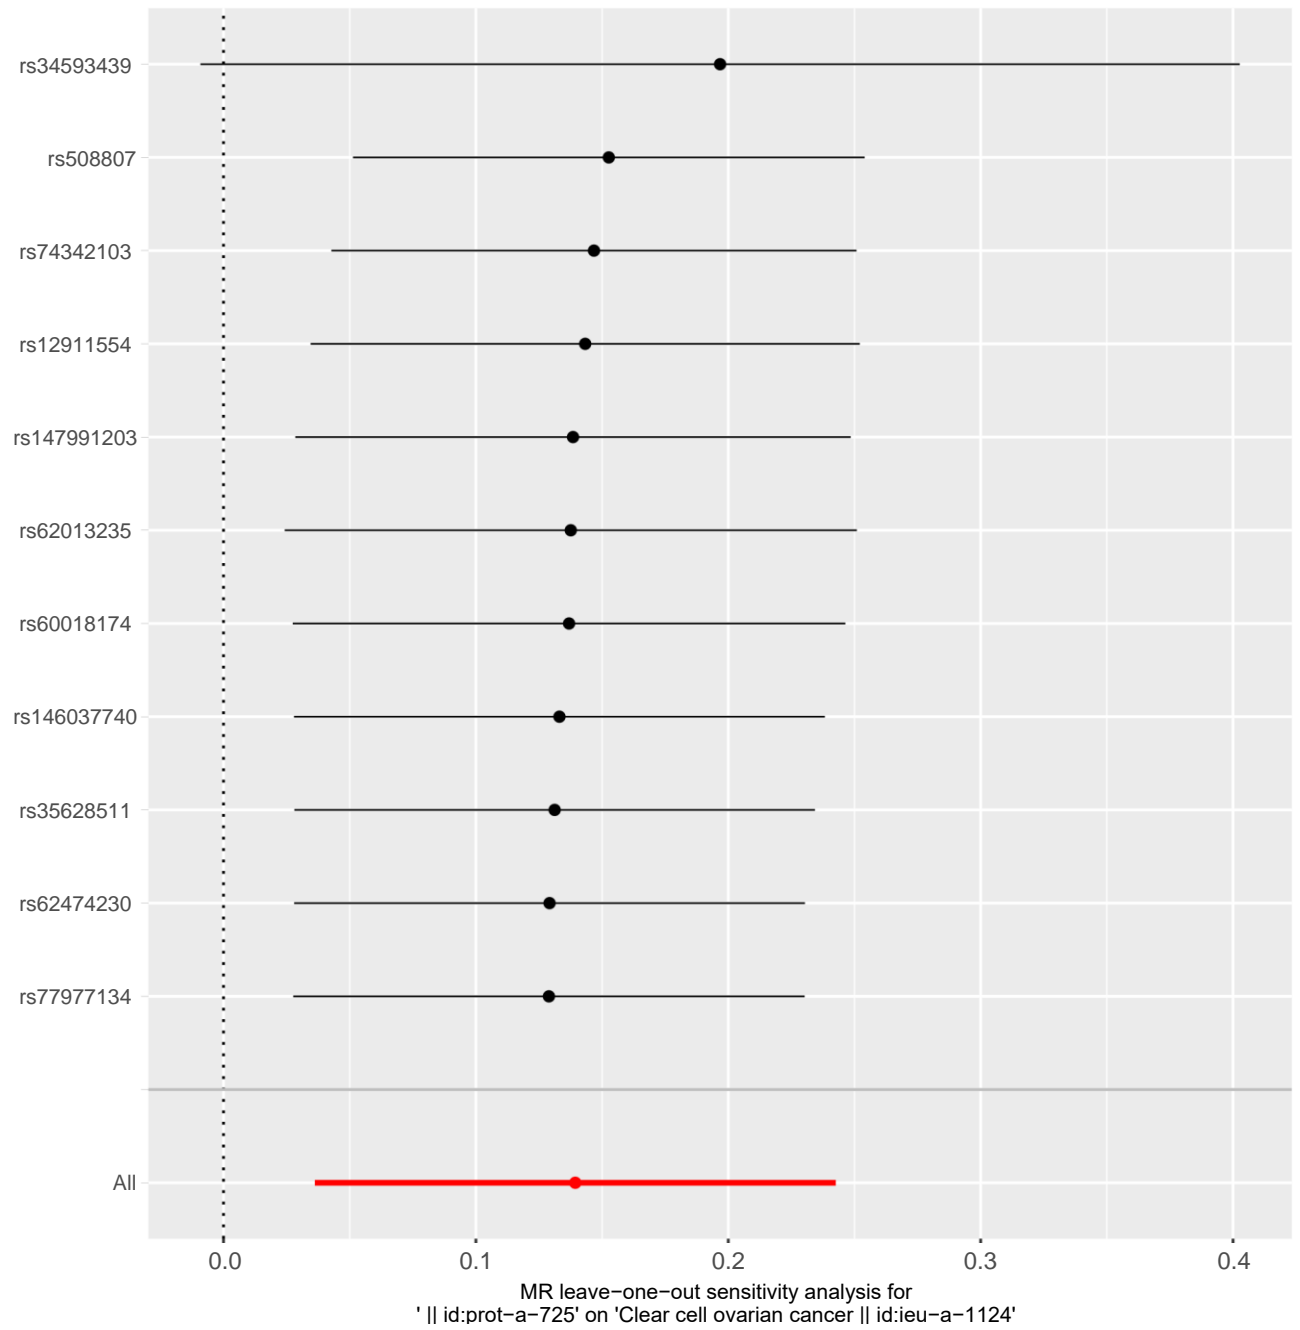

Supplement: medi-103-e40219-s002.pdf [file medi-103-e40219-s002.pdf]
